# Supplementary material for: An absorption mechanism and polarity-induced viscosity model for CO2 capture using hydroxypyridine-based ionic liquids
Source: Royal Society of Chemistry journal article supplement (doi:10.1039/c6cp07209g), 2016-11-29
Supplement: c6cp07209g1.pdf [file c6cp07209g1.pdf]

## Supporting Information

# Absorption Mechanism and Polarity-induced Viscosity Model for CO<sub>2</sub> Capture Using Hydroxypyridine-based Ionic Liquids

*Xiaowei An<sup>1</sup>, Xiao Du<sup>1</sup>, Donghong Duan<sup>1</sup>, Lijuan Shi<sup>1</sup>, Xiaogang Hao<sup>1\*</sup>, Houfang Lu<sup>2</sup>, Guoqing*

*Guan<sup>\*3</sup>, Changjun Peng<sup>4</sup>*

<sup>1</sup>Department of Chemical Engineering, Taiyuan University of Technology, Taiyuan 030024, P. R.

China

<sup>2</sup>College of Chemical Engineering, Sichuan University, Chengdu 610065, P. R. China

<sup>3</sup>North Japan Research Institute for Sustainable Energy (NJRISE), Hirosaki University, 2-1-3

Matsubara, Aomori 030-0813, Japan

<sup>4</sup>State Key Laboratory of Chemical Engineering and Department of Chemistry, East China

University of Science and Technology, Shanghai, 200237, P. R. China

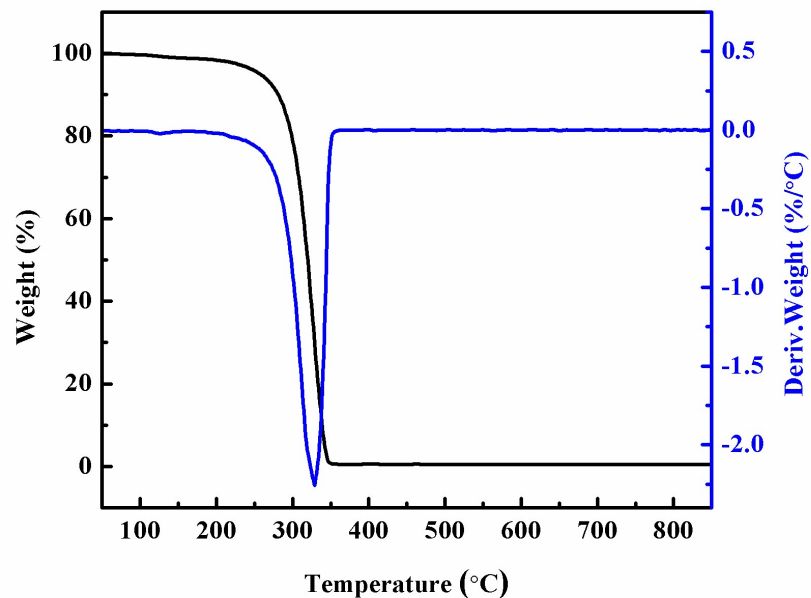

**Fig. S1** TG and DTG plot of [P<sub>4444</sub>][2-Op] with a heating rate of 10 °C/min.

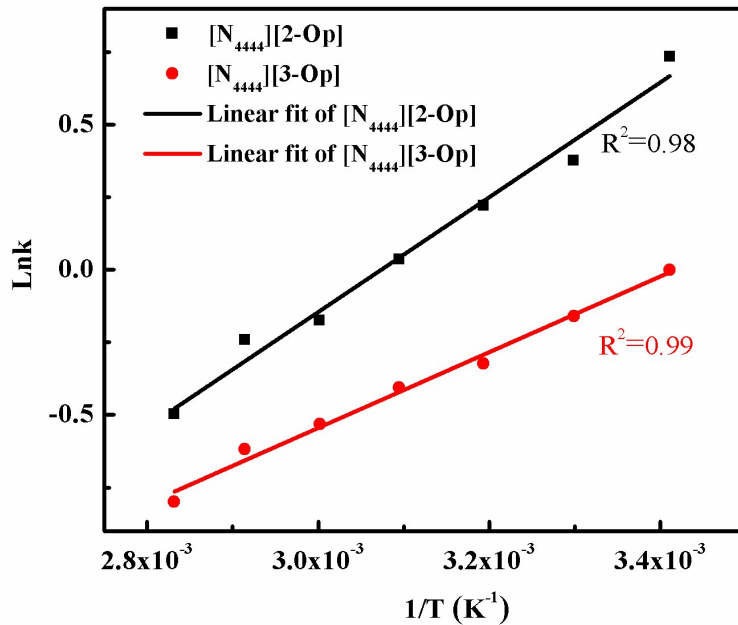

**Fig. S2** Van't Hoff plots of fitted equilibrium constants for CO<sub>2</sub> with [N<sub>4444</sub>][2-Op] and [N<sub>4444</sub>][3-Op].

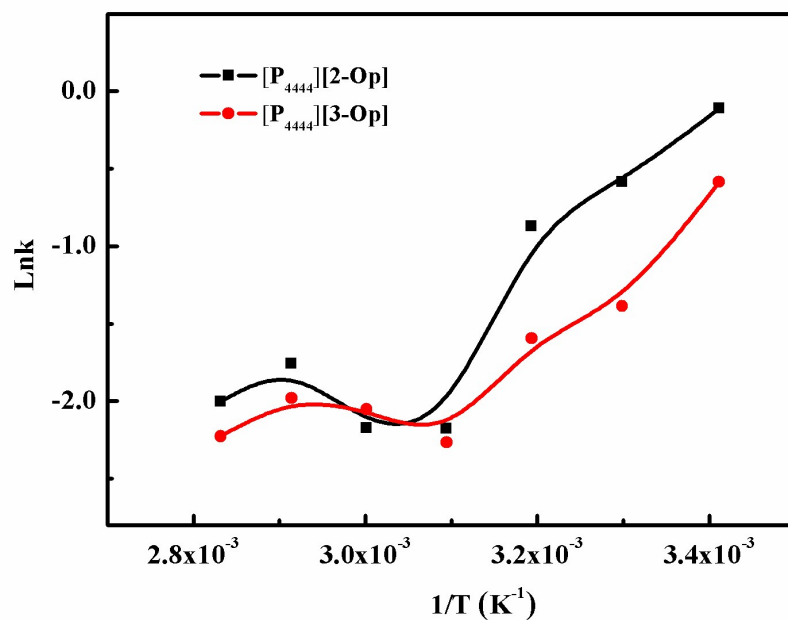

**Fig. S3** Van't Hoff plots of fitted equilibrium constants for CO<sub>2</sub> with [P<sub>4444</sub>][2-Op] and [P<sub>4444</sub>][3-Op]. The lines are drawn to guide the eye.

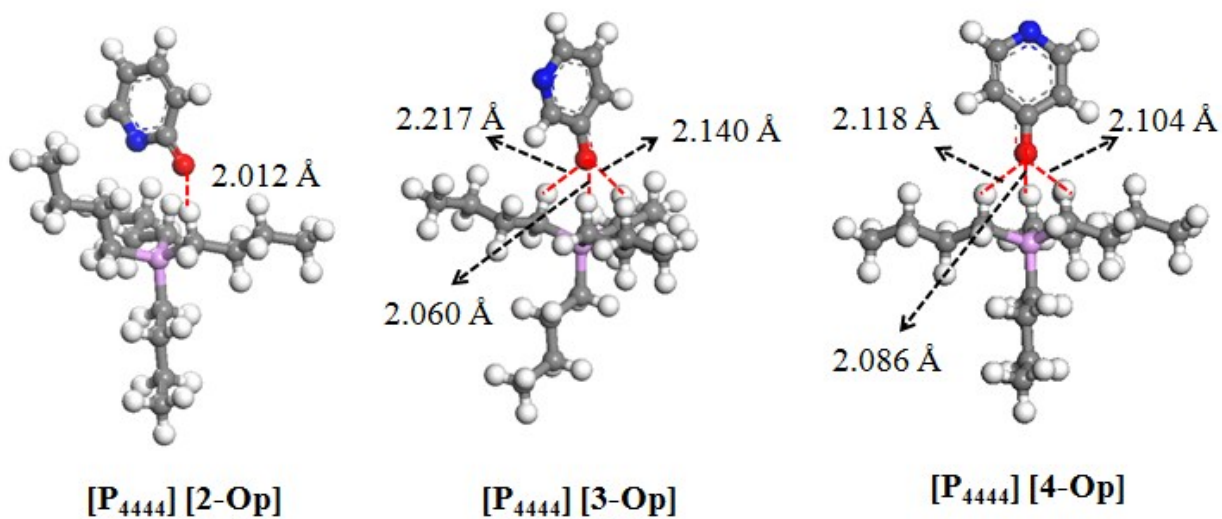

**Fig. S4** Optimized structures of [P<sub>4444</sub>][2-Op], [P<sub>4444</sub>][3-Op] and [P<sub>4444</sub>][4-Op] at the B3LYP/6-311++G\*\* level of theory.

## **NMR Data**

### **[P<sup>4444</sup>][2-Op]**

<sup>31</sup>P NMR (500 MHz, DMSO-d<sub>6</sub>): δ 46.00, 37.66, 33.80

### **[P<sup>4444</sup>][2-Op]+CO<sub>2</sub>**

<sup>31</sup>P NMR (500 MHz, DMSO-d<sub>6</sub>): δ 46.00, 37.65, 33.78, 31.48
